# Supplementary material for: Identification and characterization of L1-specific endo-siRNAs essential for early embryonic development in pig
Source: PubMed Central journal article supplement (PMC5410294; doi:10.18632/oncotarget.15517), 2017-02-19
Supplement: oncotarget-08-23167-s001.pdf [file oncotarget-08-23167-s001.pdf]

# Identification and characterization of L1-specific endo-siRNAs essential for early embryonic development in pig

## Supplementary Materials

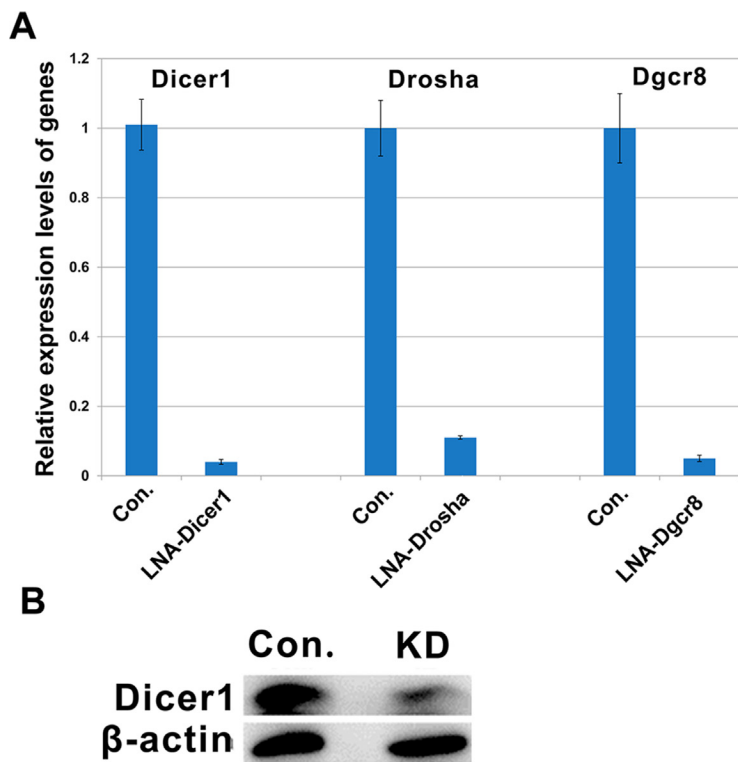

**Supplementary Figure 1: Effective knockdown of Dicer1, Drosha, Dgcr8 by LNA-siRNAs.** (A) Effective knockdown of Dicer1, Drosha, Dgcr8 mRNA checked by Q-PCR. Error bars represent s.d. ( $n = 3$ ); (B) Effective knockdown of Dicer1 protein checked by Western blot.

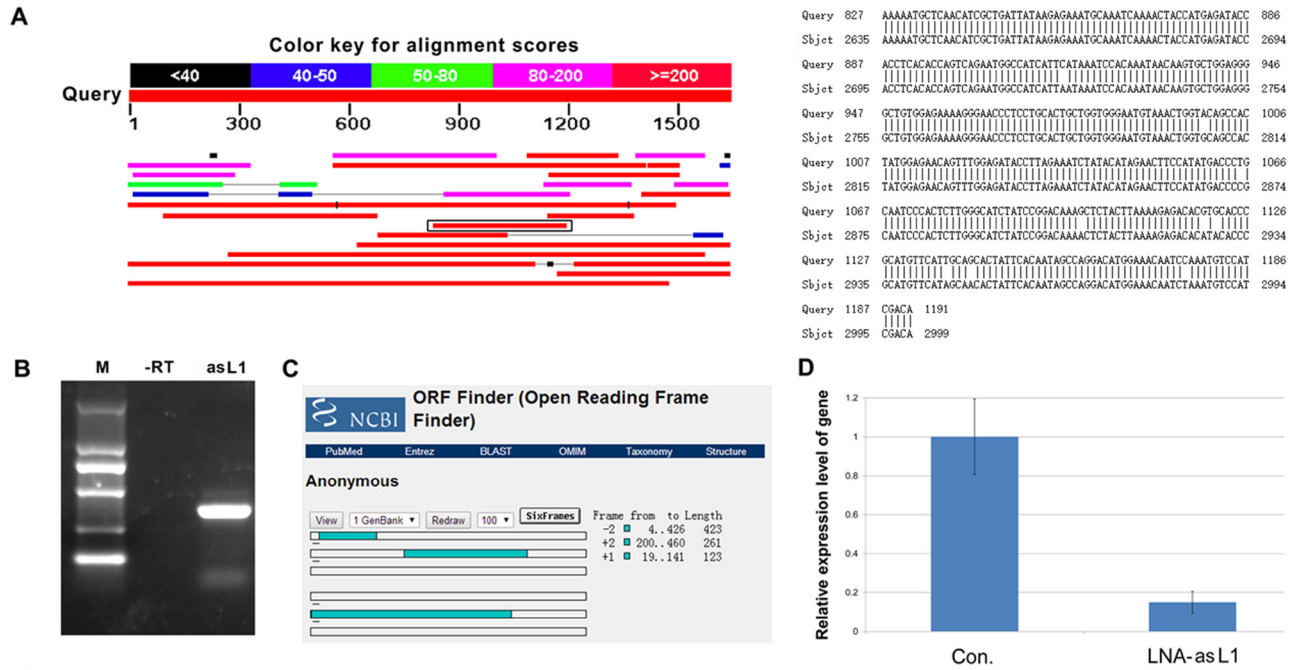

**Supplementary Figure 2: Characterization of asL1.** (A) Align ORF2 and 3' UTR sequences of L1 with upstream sequences of L1 using BLAST. The homologous sequence marked with black frame on chromosome 2 was further studied; (B) RT-PCR detects the expression of asL1. -RT, no reverse transcriptase; (C) Analysis of asL1 ORFs by ORF Finder; (D) Effective knockdown of asL1 by LNA-asL1. Error bars represent s.d. ( $n = 3$ ).

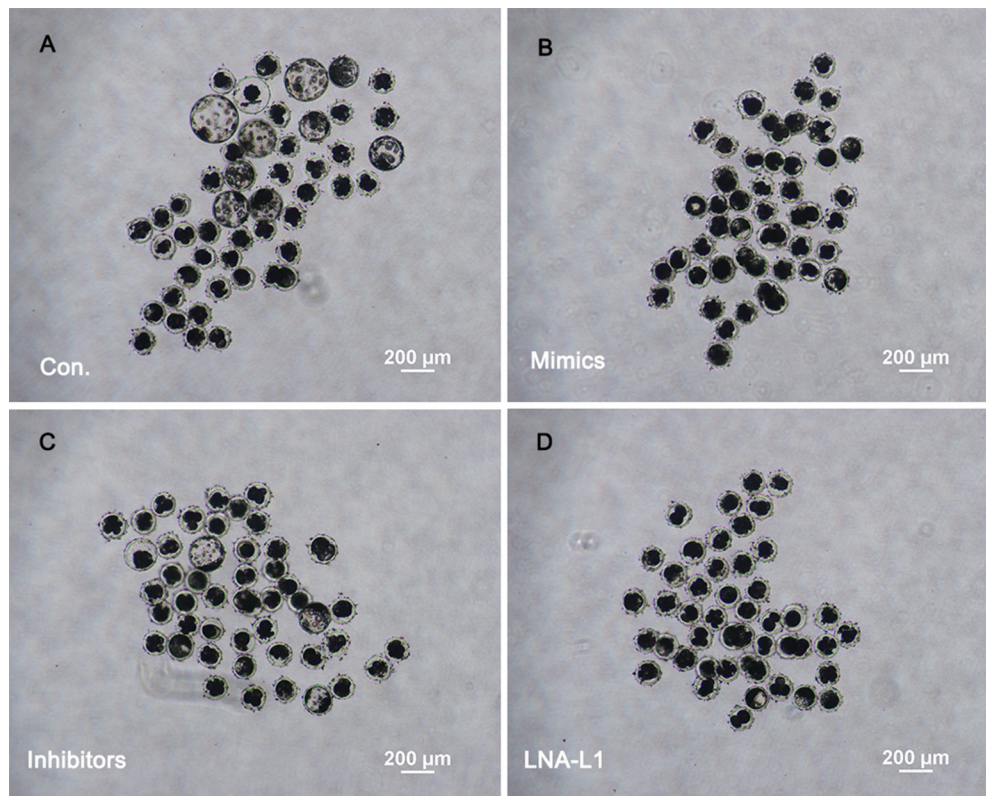

**Supplementary Figure 3: Effect of L1-specific endo-siRNAs on *in vitro* development of porcine IVF embryos.** (A) The embryos derived from uninjected oocytes (control); (B) The embryos derived from oocytes injected with L1-siRNAs mimics; (C) The embryos derived from oocytes injected with L1-siRNAs inhibitors; (D) The embryos derived from oocytes injected with LNA-L1.

**Supplementary Table 1: Lists of piRNAs detected in porcine sperms, oocytes, and zygotes.** See Supplementary\_Table\_1

**Supplementary Table 2: Lists of miRNAs detected in porcine sperms, oocytes, and zygotes.** See Supplementary\_Table\_2

**Supplementary Table 3: Lists of endo-siRNAs detected in porcine sperms, oocytes, and zygotes.** See Supplementary\_Table\_3

**Supplementary Table 4: The primer list**

| Gene     | Primer sequence (5'-3')                                          | Length (bp) | Accession number |
|----------|------------------------------------------------------------------|-------------|------------------|
| 18s rRNA | F: TCCAATGGATCCTCGCGGAA<br>R: GGCTACCACATCCAAGGAAG               | 149         | NR002170         |
| Dicer1   | F: ACAAGATCCAGAGCTGGCTTA<br>R: CACAATGCTCGTGGCAATCA              | 172         | NM_001197194.1   |
| Drosha   | F: GCCATCCCATGCTAGAACCT<br>R: CACTTCCGTGCCCTCCTTAC               | 270         | XM_013984710.1   |
| Dgcr8    | F: TCTATGAACTGACCAGCAAGGC<br>R: CCCAACTCGCTTATTCTTACACC          | 194         | NM_001206919.1   |
| L1 ORF1  | F: GTGGGATTGCGGGGTCATATG<br>R: GTGCTGGAGGGGCTGTGGAG              | 140         | EF599954.1       |
| L1 ORF2  | F: CAGCAAAGTGGCAGGATATAAGATTAAC<br>R: AATCCACAAATAACAAGTGCTGGAGG | 106         | EF599954.1       |
| asL1     | F: GGACATTTAGATTGTTTCCATGTCC<br>R: TGCTCAACATCGCTGATTATAAGAG     | 140         | -                |
